# Supplementary material for: A Comparison of Facial Color Pattern and Gazing Behavior in Canid Species Suggests Gaze Communication in Gray Wolves (Canis lupus)
Source: PLoS One. 2014 Jun 11;9(6):e98217. doi: 10.1371/journal.pone.0098217 (PMC4053341; doi:10.1371/journal.pone.0098217)
Supplement: Table S2 — Contrast indices of the studied animals. The rank of each index was shown in the parenthesis. Indices of different body color types in gray wolves (black, gray and white), red foxes (black, red and silver) and arctic foxes (white in winter, grayish-white and black in summer) were shown separately. Asterisks (*) before indices means that the values were larger than the average of each index among studied species. (XLSX) [file pone.0098217.s002.xlsx]

## Sheet: Table2
Table S2: Contrast indices of the studied animals
					Value (Rank) of index														Face color		Group
NO.	Species (body color type)		N		IP				IE				CE				CF		type	Sociality	hunting
1	Gray Wolf (black)		17	*	0.379	( 1)		*	0.369	( 1)			0.121	(28)			0.021	(26)	A	Group	○
2	Red Fox (silver)		3	*	0.368	( 2)		*	0.341	( 2)			0.228	(24)			0.021	(25)	A	Solo/Pair
1	Gray Wolf (gray)		102	*	0.328	( 3)		*	0.302	( 3)		*	0.423	(11)		*	0.111	( 3)	A	Group	○
3	Side-striped Jackal		4	*	0.304	( 4)		*	0.289	( 4)		*	0.396	(16)		*	0.052	(14)	A	Group
4	Red Wolf		11	*	0.301	( 5)		*	0.279	( 5)		*	0.356	(19)		*	0.082	( 8)	A	Group	○
1	Gray Wolf (white)		8	*	0.296	( 6)		*	0.262	( 7)		*	0.513	( 1)			0.005	(30)	A	Group	○
5	Coyote		13	*	0.287	( 7)		*	0.26	( 8)		*	0.415	(13)		*	0.088	( 7)	A	Group	○
6	Corsac Fox		3	*	0.282	( 8)		*	0.256	( 9)		*	0.4	(15)			0.025	(21)	A	Group	○
7	Golden Jackal		11	*	0.281	( 9)		*	0.223	(12)		*	0.353	(20)			0.031	(18)	A	Group	○
8	Arctic Fox (white)		4	*	0.253	(10)		*	0.231	(11)		*	0.504	( 2)			0.002	(31)	A	Solo/Pair
2	Red Fox (red)		19	*	0.248	(11)		*	0.196	(13)		*	0.343	(21)			0.042	(17)	A	Solo/Pair
9	Ethiopian Wolf		7	*	0.247	(12)		*	0.232	(10)		*	0.454	( 5)		*	0.122	( 1)	A	Group
2	Red Fox (black)		2	*	0.247	(13)		*	0.266	( 6)			0.227	(25)		*	0.053	(13)	A	Solo/Pair
10	Dhole		13	*	0.244	(14)		*	0.189	(14)			0.303	(23)			0.031	(19)	A	Group	○
8	Arctic Fox (grayish-white)		2	*	0.233	(15)			0.152	(16)		*	0.443	( 6)		*	0.068	(10)	A	Solo/Pair
11	Black-baked Jackal		10	*	0.223	(16)		*	0.171	(15)		*	0.411	(14)		*	0.115	( 2)	A	Group	○
12	Kit/Swift Fox		5		0.178	(17)			0.079	(25)		*	0.43	( 8)		*	0.065	(11)	B	Solo/Pair
8	Arctic Fox (black)		2		0.17	(18)			0.023	(30)			0.06	(30)			0.023	(23)	C	Solo/Pair
13	Ruppell'sFox		2		0.166	(19)			0.12	(19)		*	0.425	( 9)			0.022	(24)	B	Solo/Pair
14	Dingo		6		0.164	(20)			0.087	(23)		*	0.38	(17)		*	0.097	( 4)	B	Group	○
15	Chilla		2		0.143	(21)			0.121	(18)		*	0.418	(12)		*	0.088	( 6)	B	Solo/Pair
16	Bengal Fox		1		0.138	(22)			0.104	(21)		*	0.459	( 4)		*	0.062	(12)	B	Solo/Pair
17	Bush Dog		14		0.138	(23)			0.148	(17)			0.025	(31)			0.013	(29)	C	Group	○
18	Racoon Dog		10		0.137	(24)			0.036	(29)			0.075	(29)			0.03	(20)	C	Solo/Pair
19	Gray Fox		4		0.135	(25)			0.089	(22)		*	0.431	( 7)		*	0.095	( 5)	B	Solo/Pair
20	African Wild Dog		16		0.134	(26)			0.047	(28)			0.161	(27)			0.014	(28)	C	Group	○
21	Crab-eating Fox		1		0.127	(27)			0.119	(20)			0.312	(22)			0.015	(27)	C	Group
22	Manned Wolf		3		0.062	(28)			0.064	(27)		*	0.371	(18)			0.045	(16)	B	Solo/Pair
23	Fennec Fox		6		0.052	(29)			0.071	(26)		*	0.463	( 3)			0.049	(15)	B	Group
24	Cape Fox		4		0.05	(30)			0.007	(31)		*	0.424	(10)		*	0.069	( 9)	B	Solo/Pair
25	Bat-eared Fox		15		0.046	(31)			0.082	(24)			0.212	(26)			0.024	(22)	C	Group
Average of 31 (include 6 body color types) in studied canid species			320		0.205119				0.168123				0.339873				0.0509562
The rank of each index was shown in the parenthesis. Indices of different body color types in gray wolves (black, gray and white), red foxes (black, red and silver) and arctic foxes (white in winter, grayish-white and black in summer) were shown separately. Asterisks (*) before indices means that the values were larger than the average of each index among studied species.
