# Supplementary material for: A Comparison of Facial Color Pattern and Gazing Behavior in Canid Species Suggests Gaze Communication in Gray Wolves (Canis lupus)
Source: PLoS One. 2014 Jun 11;9(6):e98217. doi: 10.1371/journal.pone.0098217 (PMC4053341; doi:10.1371/journal.pone.0098217)
Supplement: Table S3 — Gazing and face-averting behavior of the three group-living species. Gazing behavior was defined as a behavior during which the animal fixes its face direction toward the other individual for over 1 s, keeping its body still in standing, crouching, sitting, lying down, upside down, or pointing posture. Face-averting behavior was defined as a behavior during which the animal keeps its face averted from other animal in vicinity of that animal for over 1 s. (XLSX) [file pone.0098217.s003.xlsx]

## Sheet: Table3
Table S3: Gazing and face-averting behavior of the three group-living species
		Duration time (s)
		Average (Maximum)
Behavior		Gray wolf		Fennec fox		Bush dog		p
Gazing		3.32±0.94 (38.0)		2.00 (8.00)		1.37±0.39 (6.00)		0.004657
1	standing	2.77±0.62 (27.0)		1.67 (4.00)		1.41±0.43 (6.00)		0.007201
2	crouching	3.09±1.86 (17.0)		2.33 (6.00)		1.00 (1.00)		0.08444
3	sitting	3.35±1.52 (8.00)		-		1.00 (1.00)		-
4	lying down	4.65±1.57 (38.0)		1.88 (8.00)		-		-
5	upside down	2.56±0.89 (5.00)		-		-		-
6	pointing	7.67 (28.0)		-		-		-
Face averting		2.74±0.68 (18.0)		3.10 (13.0)		2.83±1.89 (5.00)		0.859
		Frequency/hour/target individual
Behavior		Gray wolf		Fennec fox		Bush dog		p
Gazing		3.66±2.09		4.05		2.33±1.23		0.377
1	standing	2.57±1.56		1.8		2.11±1.10		0.7304
2	crouching	0.89±0.58		1.44		0.15±0.18		0.06229
3	sitting	0.49±0.53		-		0.10±0.21		-
4	lying down	1.45±0.99		0.81		-		-
5	upside down	0.27±0.28		-		-		-
6	pointing	0.19±0.63		-		-		-
Face averting		1.79±1.40		3.64		0.40±0.32		0.1373
Gazing behavior was defined as a behavior during which the animal fixes its face direction toward the other individual for over 1 s, keeping its body still in standing, crouching, sitting, lying down, upside down, or pointing posture. Face-averting behavior was defined as a behavior during which the animal keeps its face averted from other animal in vicinity of that animal for over 1 s.
